# Supplementary material for: A scalable solution for isolating human multipotent clinical-grade neural stem cells from ES precursors
Source: PubMed Central journal article supplement (PMC6417180; doi:10.1186/s13287-019-1163-7), 2019-03-12
Supplement: 13287_2019_1163_MOESM1_ESM.pdf [file 13287_2019_1163_MOESM1_ESM.pdf]

**Table S1** Cell culture media and buffer composition

| <b>hESC Media</b> |                                                           |                          |
|-------------------|-----------------------------------------------------------|--------------------------|
|                   | KO DMEM/F-12                                              | Thermo Fisher Scientific |
| 15%               | Knockout Serum Replacement (KSR)                          | Thermo Fisher Scientific |
| 2 mmol/L          | L-Glutamine                                               | Thermo Fisher Scientific |
| 1x                | MEM Non-Essential Amino Acids Solution (MEM-NEAA)         | Thermo Fisher Scientific |
| 0.5%              | Penicillin-Streptomycin                                   | Thermo Fisher Scientific |
| 100 µmol/L        | β-2 Mercaptoethanol                                       | Sigma-Aldrich            |
| 10 ng/mL          | Human Recombinant Basic Fibroblast Growth Factor-2 (bFGF) | Thermo Fisher Scientific |

| <b>EB Media</b> |                                                   |                          |
|-----------------|---------------------------------------------------|--------------------------|
|                 | KO DMEM/F-12                                      | Thermo Fisher Scientific |
| 15%             | Knockout Serum Replacement (KSR)                  | Thermo Fisher Scientific |
| 2 mmol/L        | L-Glutamine                                       | Thermo Fisher Scientific |
| 1x              | MEM Non-Essential Amino Acids Solution (MEM-NEAA) | Thermo Fisher Scientific |
| 0.5%            | Penicillin-Streptomycin                           | Thermo Fisher Scientific |
| 100 µmol/L      | β-2 Mercaptoethanol                               | Sigma-Aldrich            |

| <b>NSC Media</b> |                                                           |                          |
|------------------|-----------------------------------------------------------|--------------------------|
|                  | DMEM/F12                                                  | Corning                  |
| 2 mmol/L         | L-Glutamine                                               | Thermo Fisher Scientific |
| 1x               | MEM Non-Essential Amino Acids Solution (MEM-NEAA)         | Thermo Fisher Scientific |
| 0.5%             | Penicillin-Streptomycin                                   | Thermo Fisher Scientific |
| 0.5x             | N2 Media Supplement                                       | Thermo Fisher Scientific |
| 0.5x             | B27 Media Supplement                                      | Thermo Fisher Scientific |
| 20 ng/mL         | Human Recombinant Basic Fibroblast Growth Factor-2 (bFGF) | Thermo Fisher Scientific |

| <b>Neuron Differentiation Media</b> |          |                          |
|-------------------------------------|----------|--------------------------|
|                                     | DMEM/F12 | Thermo Fisher Scientific |

|          |                                                   |                          |
|----------|---------------------------------------------------|--------------------------|
| 2 mmol/L | L-Glutamine                                       | Thermo Fisher Scientific |
| 1x       | MEM Non-Essential Amino Acids Solution (MEM-NEAA) | Thermo Fisher Scientific |
| 0.5%     | Penicillin-Streptomycin                           | Thermo Fisher Scientific |
| 0.5x     | N2 Media Supplement                               | Thermo Fisher Scientific |
| 0.5x     | B27 Media Supplement                              | Thermo Fisher Scientific |
| 10ng/ml  | Recombinant Human BDNF                            | PeproTech                |
| 10ng/ml  | Recombinant Human GDNF                            | PeproTech                |
| 0.5M     | cAMP                                              | Sigma-Aldrich            |

|                                        |                     |                          |
|----------------------------------------|---------------------|--------------------------|
| <b>Astrocyte differentiation media</b> |                     |                          |
|                                        | DMEM-Glutamax       | Thermo Fisher Scientific |
| 10%                                    | FBS                 | Thermo Fisher Scientific |
| 0.4%                                   | N2 Media Supplement | Thermo Fisher Scientific |

|                                           |                  |               |
|-------------------------------------------|------------------|---------------|
| <b>Cell Culture Coating and Dilutions</b> |                  |               |
| 1:4 in Sterile Water                      | Poly-L-Ornithine | Sigma-Aldrich |
| 1:200 in PBS                              | Laminin (1mg/ml) | Sigma-Aldrich |

|                    |      |                          |
|--------------------|------|--------------------------|
| <b>FACS Buffer</b> |      |                          |
|                    | PBS  | Thermo Fisher Scientific |
| 2%                 | FBS  | Thermo Fisher Scientific |
| 1%                 | EDTA | Thermo Fisher Scientific |

|                             |             |               |
|-----------------------------|-------------|---------------|
| <b>FACS Blocking Buffer</b> |             |               |
|                             | FACS Buffer |               |
| 10%                         | Mouse Serum | Sigma-Aldrich |
