# Supplementary material for: A scalable solution for isolating human multipotent clinical-grade neural stem cells from ES precursors
Source: PubMed Central journal article supplement (PMC6417180; doi:10.1186/s13287-019-1163-7), 2019-03-12
Supplement: 13287_2019_1163_MOESM2_ESM.pdf [file 13287_2019_1163_MOESM2_ESM.pdf]

**Table S2** Antibodies used for Flow cytometry, FACS and immunofluorescence staining.

| <b>Antibodies used for Flow cytometry and FACS</b> |              |                |
|----------------------------------------------------|--------------|----------------|
| <b>Catalog #</b>                                   | <b>Name</b>  | <b>Company</b> |
| 555427                                             | CD24 - FITC  | BD Biosciences |
| 555479                                             | CD44 - PE    | BD Biosciences |
| 550538                                             | CD44         | BD Biosciences |
| 555976                                             | CD184 - APC  | BD Biosciences |
| 557196                                             | CD271 - PE   | BD Biosciences |
| 560341                                             | Nestin - APC | BD Biosciences |
| 561470                                             | GFAP - APC   | BD Biosciences |
| 561549                                             | Sox1 - PerCp | BD Biosciences |
| 561462                                             | Pax6 - FITC  | BD Biosciences |
| 561610                                             | Sox2 - V450  | BD Biosciences |
| 560261                                             | Nanog - FITC | BD Biosciences |

| <b>Primary Antibodies used for Indirect immunofluorescence and Histology</b> |                                               |                                                                                     |
|------------------------------------------------------------------------------|-----------------------------------------------|-------------------------------------------------------------------------------------|
| <b>Catalog #</b>                                                             | <b>Name</b>                                   | <b>Company</b>                                                                      |
| 33-9100                                                                      | ZO-1                                          | Thermo Fisher Scientific                                                            |
| MAB5326                                                                      | Nestin                                        | EMD Millipore                                                                       |
| sc-22839                                                                     | Plzf                                          | Santa Cruz Biotechnology                                                            |
| HPA012672                                                                    | Dach-1                                        | Sigma-Aldrich                                                                       |
| 610920                                                                       | N-cadherin                                    | BD Biosciences                                                                      |
| AB2253                                                                       | Doublecortin (DCX)                            | EMD Millipore                                                                       |
| C9205                                                                        | GFAP (Cy3-labeled)                            | Sigma-Aldrich                                                                       |
| AB5733                                                                       | Vimentin                                      | EMD Millipore                                                                       |
| MAB2018                                                                      | Sox2                                          | R&D Systems                                                                         |
| M4403                                                                        | MAP2                                          | Sigma-Aldrich                                                                       |
| HO14                                                                         | Human-Specific Axonal Neurofilament (HO14)    | Gift from Center for Neurodegenerative Disease Research, University of Pennsylvania |
| AB9610                                                                       | Olig2                                         | EMD Millipore                                                                       |
| AB15580                                                                      | Ki67                                          | Abcam                                                                               |
| MAB377                                                                       | Neuronal nuclei (NeuN)                        | EMD Millipore                                                                       |
| MAB1281                                                                      | Anti-Human Nuclei (hNUMA)                     | EMD Millipore                                                                       |
| VPN755                                                                       | human-specific neuron-specific enolase (hNSE) | Vector                                                                              |
| MAB3786                                                                      | APC                                           | EMD Millipore                                                                       |
| MAB332                                                                       | hSYN                                          | EMD Millipore                                                                       |
| 131002                                                                       | VGAT                                          | Synaptic Systems                                                                    |
| AB49832                                                                      | GAD65                                         | Abcam                                                                               |

|        |        |               |
|--------|--------|---------------|
| AB5905 | VGLUT1 | EMD Millipore |
| AB2251 | VGLUT2 | EMD Millipore |
| AB5421 | VGLUT3 | EMD Millipore |
| AB144P | ChAT   | Chemicon      |

| <b>Fluorescent-conjugated secondary donkey antibodies</b> |                    |                          |
|-----------------------------------------------------------|--------------------|--------------------------|
| <b><i>Dilution</i></b>                                    | <b><i>Name</i></b> | <b><i>Company</i></b>    |
| 1:500                                                     | Alexa® Fluor 488   | Jackson Immuno Research  |
| 1:500                                                     | Alexa® Fluor 647   | Jackson Immuno Research  |
| 1:500                                                     | Alexa® Fluor 555   | Thermo Fisher Scientific |
