# Supplementary material for: A scalable solution for isolating human multipotent clinical-grade neural stem cells from ES precursors
Source: PubMed Central journal article supplement (PMC6417180; doi:10.1186/s13287-019-1163-7), 2019-03-12
Supplement: 13287_2019_1163_MOESM3_ESM.pdf [file 13287_2019_1163_MOESM3_ESM.pdf]

**Table S3** Experimental Groups.

| <b>Post cell-grafting survival/assays</b> | <b>3 weeks IF</b> | <b>6-8 weeks / 3 months(*) IF/ mRNA seq</b> | <b>6 months IF/ iEM/ mRNA seq</b> |
|-------------------------------------------|-------------------|---------------------------------------------|-----------------------------------|
|                                           |                   |                                             |                                   |
| <b>Athymic rats</b>                       | <b>n=12</b>       | <b>n=6 / n=3</b>                            | <b>n=6 / n=3 / n=3</b>            |
| <b>G93A ALS rats</b>                      | <b>--</b>         | <b>n=8</b>                                  | <b>--</b>                         |
| <b>Adult pigs</b>                         | <b>--</b>         | <b>n=3 (*)</b>                              | <b>--</b>                         |
|                                           |                   |                                             |                                   |

**IF:** immunofluorescence, **mRNA seq:** mRNA sequencing, **iEM:** immune-electron microscopy
